# Supplementary material
Source: publisher site journal article supplement (https://www.dovepress.com/article/602311)
Supplement: Supplementary file 1 [file 602311%20Supplementary%20Material.docx]

**Supplementary Table S1. Acoustic features most strongly associated with changes in peak expiratory flow (ΔPEF)**

| **Feature** | **Spearman’s ρ (ΔPEF)** | **p-value** | **Spearman’s ρ (ΔFEV1)** | **p-value** |
| --- | --- | --- | --- | --- |
| Wheezing ratio | 0.2379 | 0.058 | 0.1033 | 0.417 |
| Spectral bandwidth | 0.2074 | 0.100 | −0.0352 | 0.783 |
| Wheezing power | −0.2049 | 0.104 | −0.0897 | 0.481 |
| High-frequency sound (800–1200 Hz) | 0.1418 | 0.264 | −0.1017 | 0.424 |
| Ultra-high-frequency sound (1600–2000 Hz) | 0.1386 | 0.275 | −0.0664 | 0.602 |

Statistical significance was defined as a p-value < 0.05.

**Supplementary Table S2. Acoustic features most strongly associated with changes in forced expiratory volume in one second (ΔFEV1)**

| **Feature** | **Spearman’s ρ (ΔPEF)** | **p-value** | **Spearman’s ρ (ΔFEV1)** | **p-value** |
| --- | --- | --- | --- | --- |
| Spectral centroid | 0.1118 | 0.379 | 0.1398 | 0.271 |
| Mid-frequency sound (400–800 Hz) | 0.1087 | 0.392 | 0.1160 | 0.361 |
| Wheezing ratio | 0.2379 | 0.058 | 0.1033 | 0.417 |
| High-frequency sound (800–1200 Hz) | 0.1418 | 0.264 | −0.1017 | 0.424 |
| Wheezing power | −0.2049 | 0.104 | −0.0897 | 0.481 |

Statistical significance was defined as a p-value < 0.05.

**Figures:**


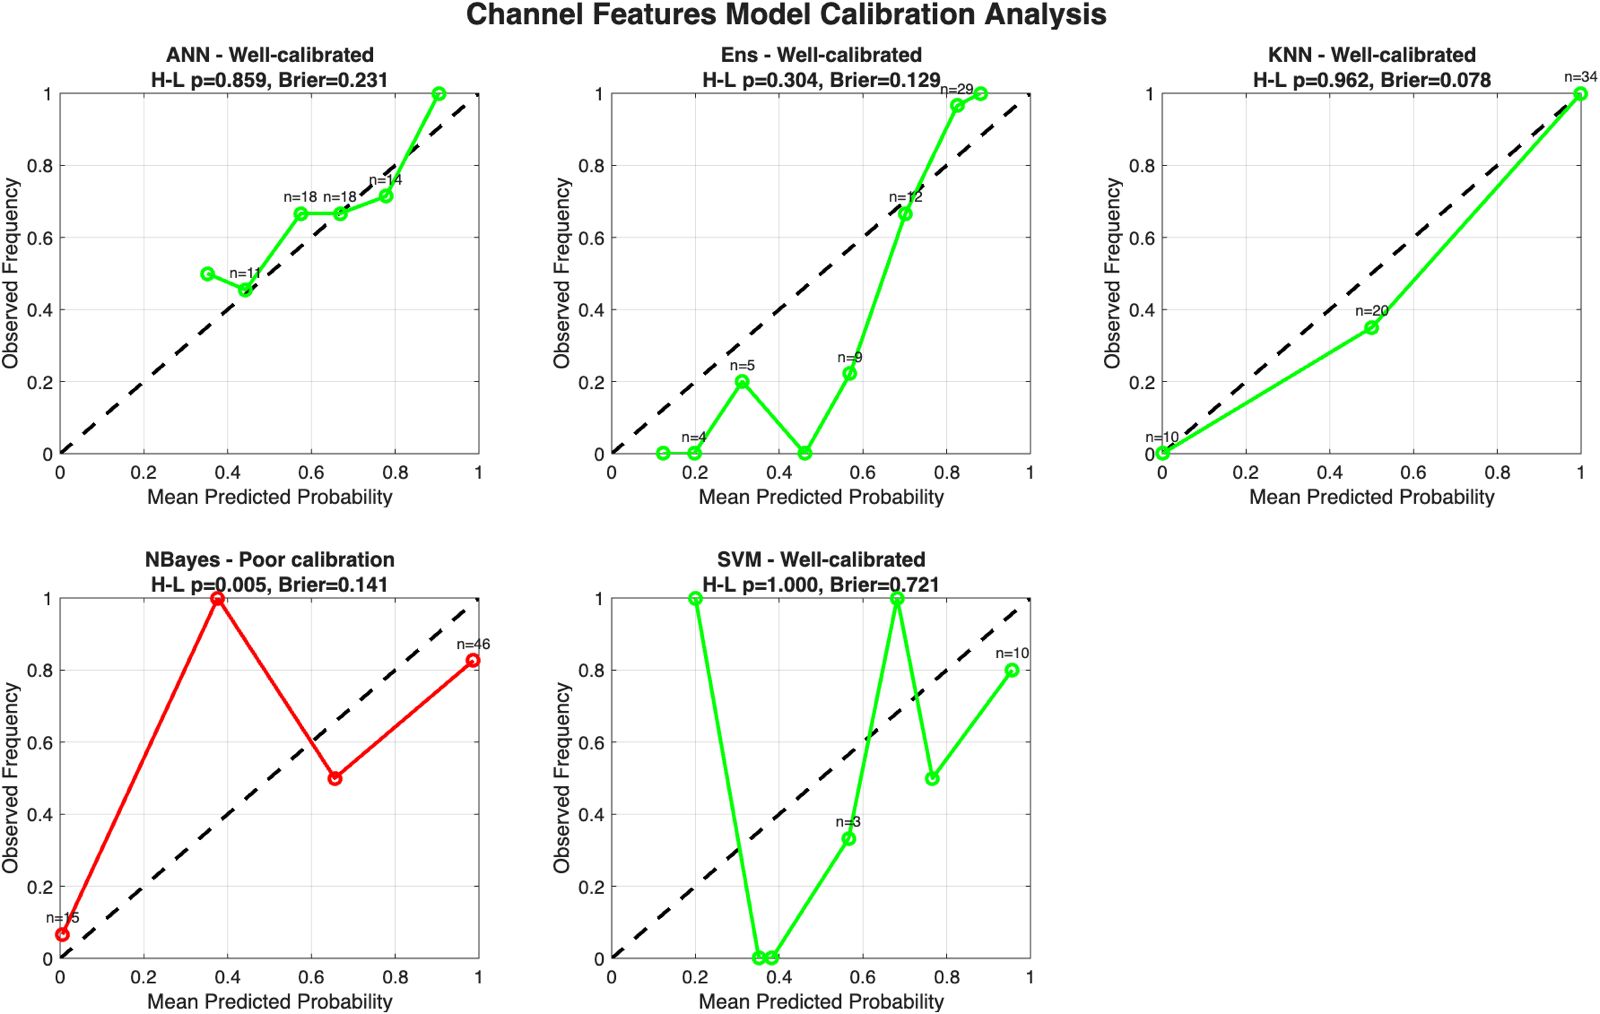


Supplementary Figure 1. Calibration curves of machine learning algorithms for the demographic+acoustic model (Model 1).


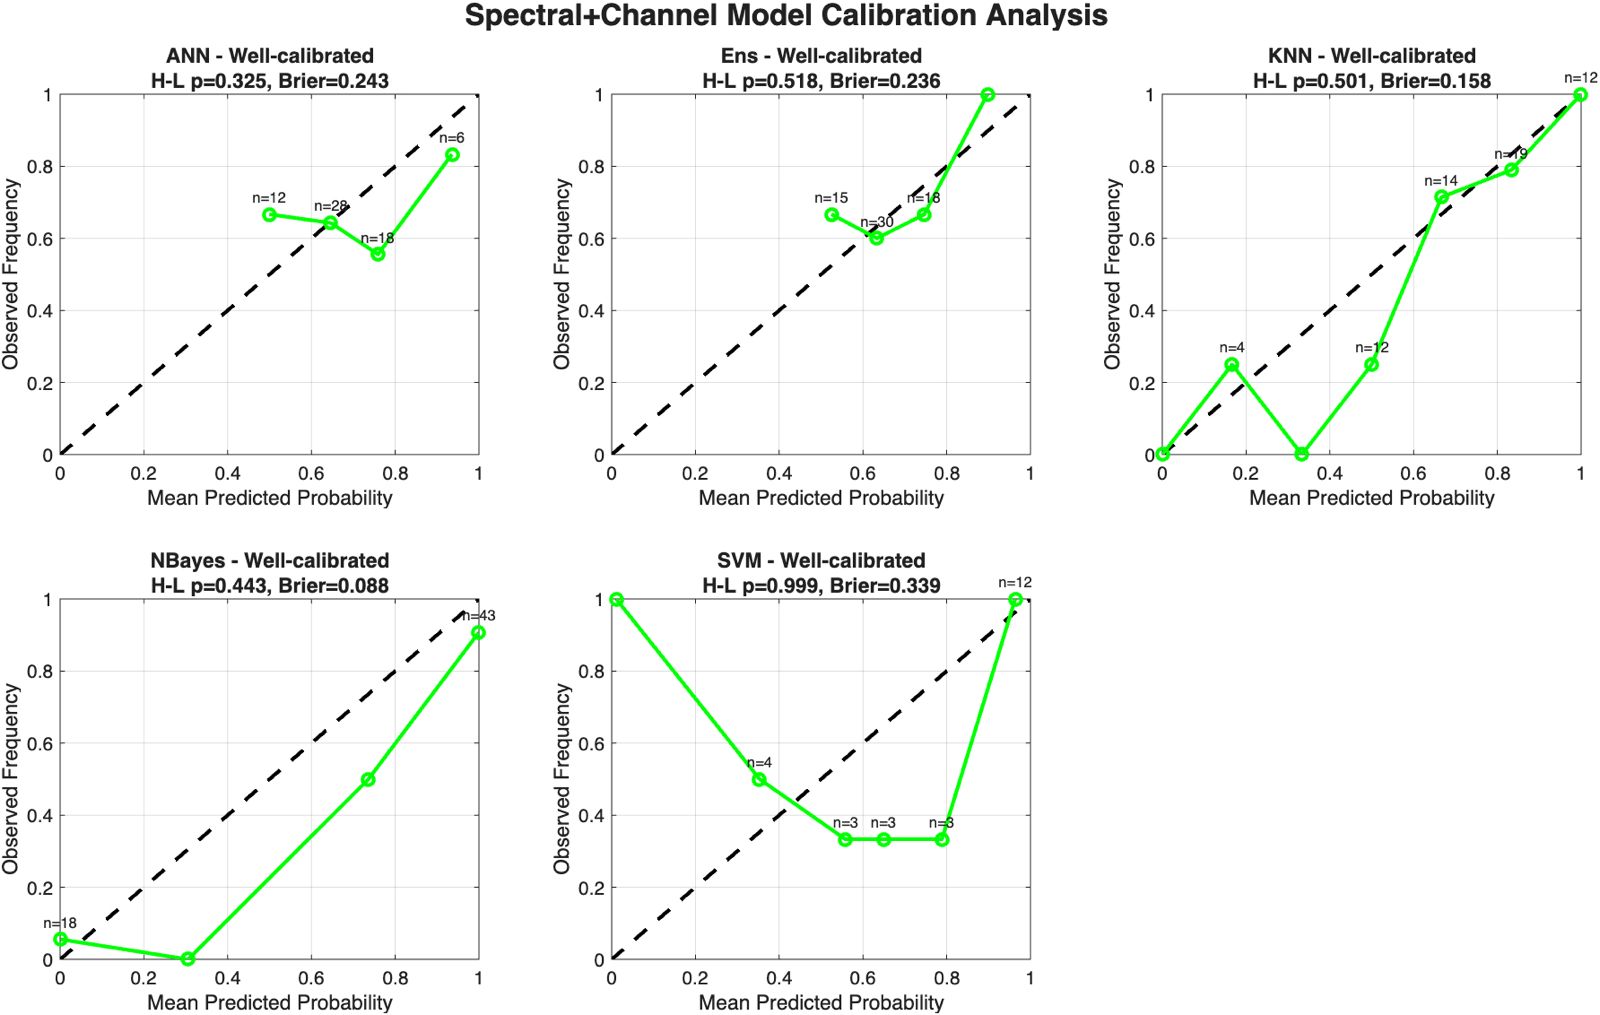


Supplementary Figure 2. Calibration curves of machine learning algorithms for the demographic+spectral+ acoustic model (Model 2).


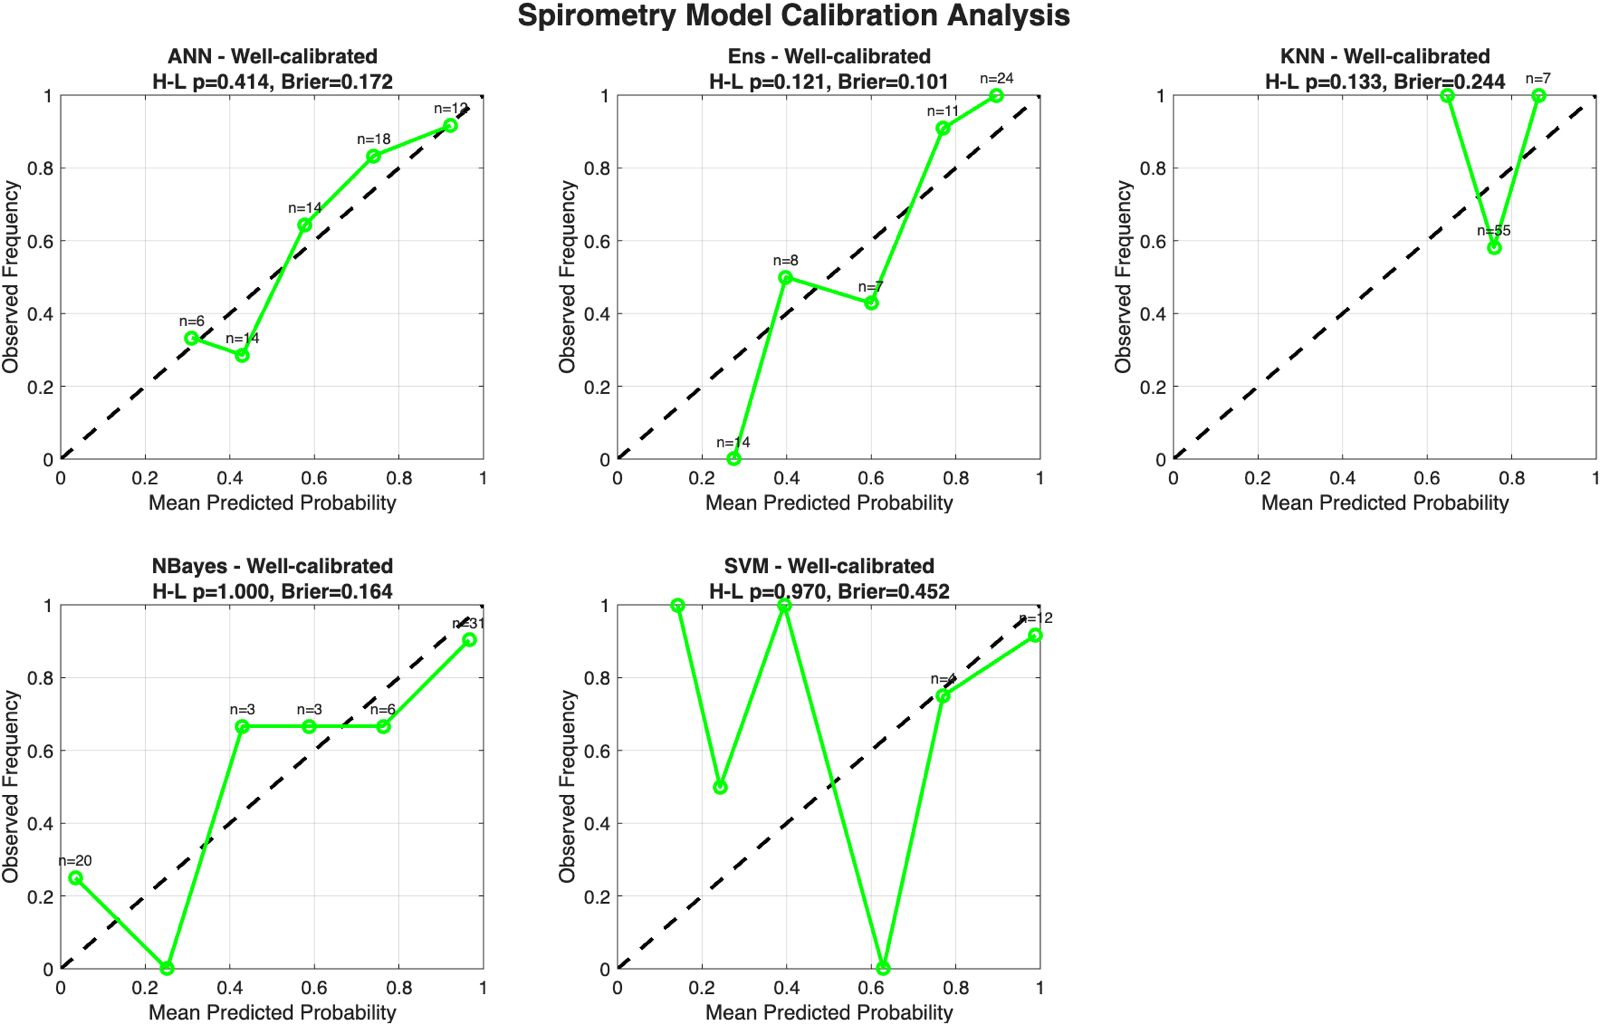


Supplementary Figure 3. Calibration curves of machine learning algorithms for the demographic+spirometric model (Model 3).


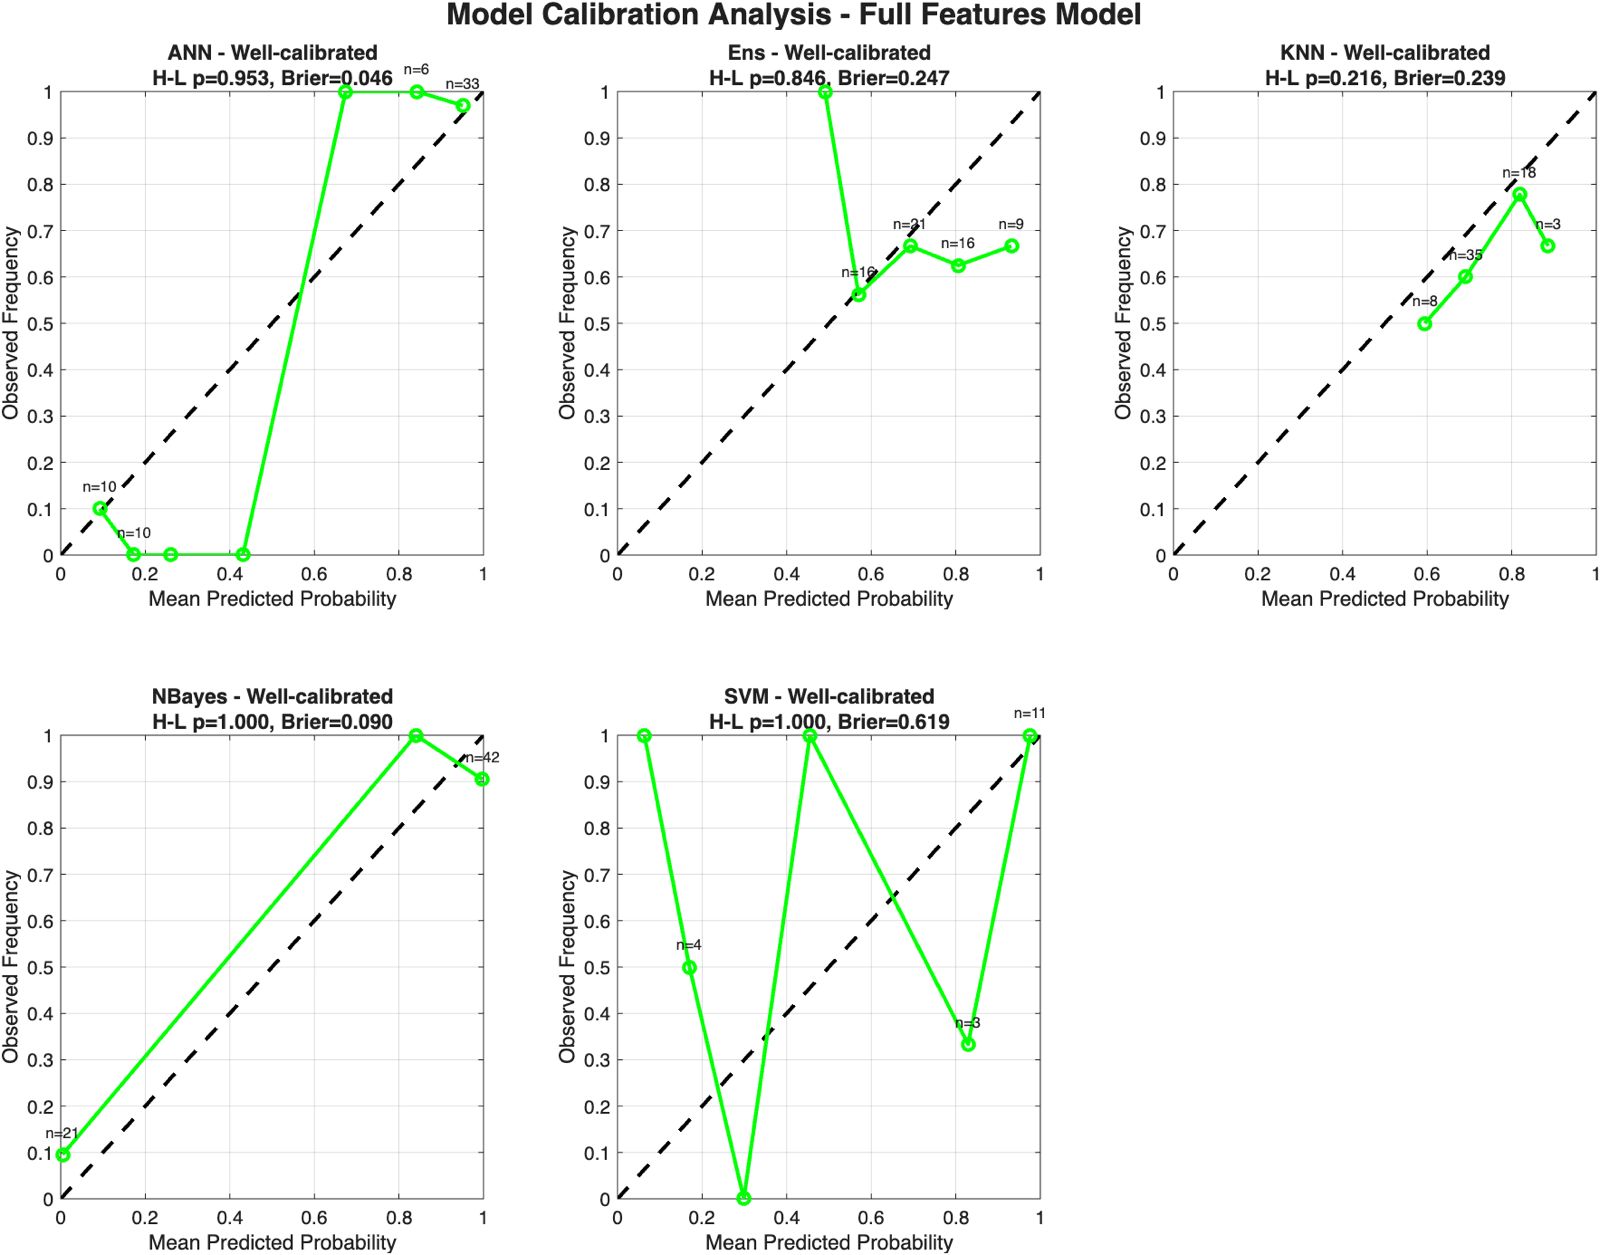


Supplementary Figure 4. Calibration curves of machine learning algorithms for the full-feature model (Model 4).
